# Supplementary material
Source: publisher figshare collection journal article supplement (https://acs.figshare.com/ndownloader/files/4177120)
Supplement: Supplementary file 1 [file 4177120]

## Supplemental Figure 1

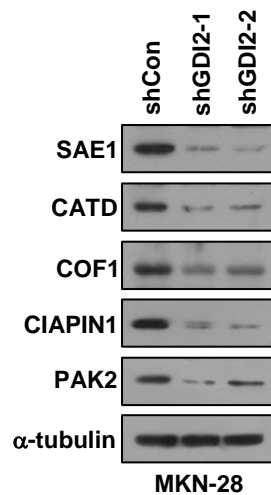

**Supplemental Figure 1. Depletion of RhoGDI2 downregulates the expression of SAE1, CATD, COF1, CIAPIN1, and PAK2.** Western blot analyses of 5 proteins downregulated in RhoGDI2-depleted MKN-28(shGDI2-1 and GDI2-2) cells. Data are the representative images of more than 3 individual experiments.

**Supplementary Table 1.** siRNA sequences used in this study.

| Name of Gene | siRNA sequences           |
|--------------|---------------------------|
| SAE1         | 5'-CUAUGUUGGUCCUUUGUUU-3' |
| Cofilin1     | 5'-GCGGCUCCUACUAAACGGA-3' |
| CIAPIN1      | 5'-GUUUCUUCACCUCAUGUUA-3' |
| Cathepsin D  | 5'-CCAGCACCUACGUGAAGAA-3' |
| PAK2         | 5'-CAGUGAAGCAGAAAUAUCU-3' |
